# Supplementary material
Source: PubMed Central journal article supplement (PMC11028051)
Supplement: 262_2019_2396_MOESM1_ESM.pdf [file 262_2019_2396_MOESM1_ESM.pdf]

# Supplementary Fig.

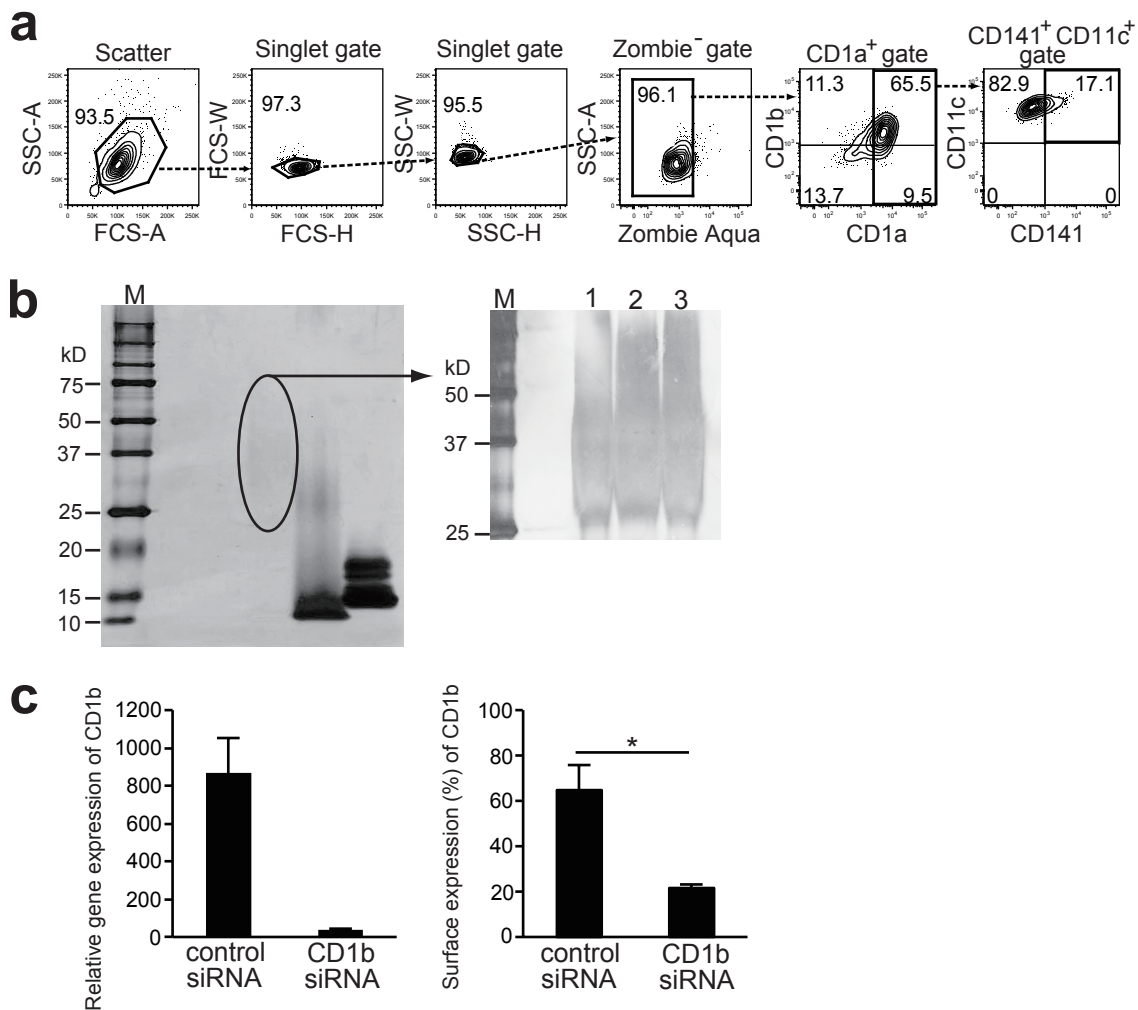

(a) Representative gating strategies of flow cytometry for the detection of DCs.

DCs were identified as Zombie<sup>-</sup>, CD1a<sup>+</sup>, CD1b<sup>+</sup>, CD141<sup>+</sup>, and CD11c<sup>+</sup>.

(b) Temperature-dependency of protein detection in LAM by silver stain SDS-PAGE gel. Lane1: 100°C, 5min, Lane2: 70°C, 30 min, Lane3: 37°C, 2 hours.

Lift figure is the same as Fig. 2a.

(c) Suppression of CD1b expression on MDDCs by using CD1b-siRNA.

The left shows gene expression by real-time PCR and the right shows surface expression by flow cytometry. Data are shown as the mean  $\pm$  S.D. of  $n=4$  samples per measurement. \* $p < 0.05$ ; one-way ANOVA analysis followed by Bonferroni post-tests to evaluate statistical differences.
